# Supplementary material for: Proteomic Profile of M. longissimus thoracis from Commercial Lambs Reared in Different Forage Systems
Source: MDPI journal article supplement (doi:10.3390/foods11101419), 2022-05-13
Supplement: s1 [file s1]

**Table S1.** List of total identified proteins in *longissimus lumborum* muscle from six types of typical commercial New Zealand forage lamb production systems.

| Accession Number     | Significance | Coverage (%) | Total Peptides | Unique Peptides | Post-translational modification                                                                            | Description                                                                  |
|----------------------|--------------|--------------|----------------|-----------------|------------------------------------------------------------------------------------------------------------|------------------------------------------------------------------------------|
| XP_011992886.2       | 1.63         | 12           | 78             | 77              | Carbamidomethylation; Deamidation (NQ); Pyro-glu from Q                                                    | LOW QUALITY PROTEIN: nebulin [Ovis aries]                                    |
| XP_027824589.1       | 6.88         | 41           | 76             | 69              | Carbamidomethylation; Deamidation (NQ); Phosphorylation (STY); Dehydration; Dethiomethyl                   | LOW QUALITY PROTEIN: filamin-C [Ovis aries]                                  |
| W5PX04 W5PX04_SHEEP  | 2.24         | 49           | 50             | 49              | Carbamidomethylation; Deamidation (NQ); Oxidation (M); Phosphorylation (STY); Dehydration; Pyro-glu from Q | Myosin binding protein C fast type OS=Ovis aries OX=9940 GN=MYBPC2 PE=4 SV=1 |
| XP_027815274.1       | 1.36         | 72           | 63             | 47              | Carbamidomethylation; Deamidation (NQ); Oxidation (M); Dehydration; Pyro-glu from Q                        | alpha-actinin-3 isoform X2 [Ovis aries]                                      |
| XP_011957551.3       | 1.36         | 69           | 63             | 47              | Carbamidomethylation; Deamidation (NQ); Oxidation (M); Dehydration; Pyro-glu from Q                        | alpha-actinin-3 isoform X1 [Ovis aries]                                      |
| sp O18751 PYGM_SHEEP | 1.4          | 48           | 45             | 36              | Carbamidomethylation; Deamidation (NQ); Oxidation (M); Pyro-glu from Q; Formylation                        | Glycogen phosphorylase muscle form OS=Ovis aries OX=9940 GN=PYGM PE=2 SV=3   |
| XP_012036281.1       | 4.43         | 60           | 34             | 33              | Carbamidomethylation; Deamidation (NQ); Oxidation (M); Dehydration; Pyro-glu from Q; Formylation           | pyruvate kinase PKM isoform X1 [Ovis aries]                                  |
| XP_004021419.1       | 1.76         | 57           | 53             | 33              | Carbamidomethylation; Deamidation (NQ); Oxidation (M); Pyro-glu from Q                                     | alpha-actinin-2 [Ovis aries]                                                 |
| XP_012045938.1       | 4.26         | 80           | 59             | 31              | Carbamidomethylation; Deamidation (NQ); Oxidation (M); Phosphorylation (STY); Dehydration; 2 more          | LOW QUALITY PROTEIN: creatine kinase M-type [Ovis aries]                     |
| XP_014959134.2       | 1.82         | 22           | 28             | 28              | Carbamidomethylation; Deamidation (NQ); Oxidation (M); Pyro-glu from Q                                     | myomesin-1 isoform X1 [Ovis aries]                                           |
| W5QDF3 W5QDF3_SHEEP  | 2.87         | 49           | 107            | 26              | Carbamidomethylation; Deamidation (NQ); Oxidation (M); Phosphorylation (STY); Dehydration; 3 more          | Myosin heavy chain 7 OS=Ovis aries OX=9940 GN=MYH7 PE=3 SV=1                 |
| XP_004010374.1       | 2.87         | 49           | 107            | 26              | Carbamidomethylation; Deamidation (NQ); Oxidation (M); Phosphorylation (STY); Dehydration; 3 more          | myosin-7 [Ovis aries]                                                        |
| XP_012040978.1       | 0.33         | 73           | 40             | 26              | Carbamidomethylation; Deamidation (NQ); Oxidation (M); Phosphorylation (STY); Dehydration                  | beta-enolase isoform X1 [Ovis aries]                                         |

|                         |      |    |    |    |                                                                                                              |                                                                                         |
|-------------------------|------|----|----|----|--------------------------------------------------------------------------------------------------------------|-----------------------------------------------------------------------------------------|
| XP_01203238<br>2.1      | 4.02 | 26 | 25 | 25 | Carbamidomethylation; Deamidation (NQ)                                                                       | glycogen debranching enzyme [Ovis aries]                                                |
| NP_00117731<br>9.1      | 3.31 | 74 | 30 | 24 | Carbamidomethylation; Deamidation (NQ);<br>Oxidation (M); Dehydration                                        | glyceraldehyde-3-phosphate dehydrogenase<br>[Ovis aries]                                |
| W5PDG3 W5P<br>DG3_SHEEP | 3.31 | 73 | 30 | 24 | Carbamidomethylation; Deamidation (NQ);<br>Oxidation (M); Dehydration                                        | Glyceraldehyde-3-phosphate dehydrogenase<br>OS=Ovis aries OX=9940 GN=GAPDH<br>PE=3 SV=1 |
| NP_00113598<br>8.1      | 1.05 | 60 | 23 | 23 | Carbamidomethylation; Deamidation (NQ);<br>Oxidation (M); Pyro-glu from Q                                    | phosphoglycerate kinase 1 [Ovis aries]                                                  |
| XP_00400662<br>1.1      | 0.88 | 62 | 22 | 22 | Deamidation (NQ); Oxidation (M)                                                                              | ATP synthase subunit beta mitochondrial<br>[Ovis aries]                                 |
| XP_00400500<br>1.1      | 1.95 | 51 | 24 | 21 | Carbamidomethylation; Deamidation (NQ); Pyro-<br>glu from Q                                                  | desmin [Ovis aries]                                                                     |
| XP_00400641<br>3.2      | 2.79 | 45 | 19 | 19 | Carbamidomethylation; Deamidation (NQ);<br>Oxidation (M)                                                     | glycerol-3-phosphate dehydrogenase<br>[NAD(+)] cytoplasmic isoform X1 [Ovis<br>aries]   |
| W5PW05 W5P<br>W05_SHEEP | 2.36 | 45 | 19 | 19 | Carbamidomethylation; Deamidation (NQ);<br>Dehydration; Formylation                                          | Malate dehydrogenase 2 OS=Ovis aries<br>OX=9940 GN=MDH2 PE=4 SV=1                       |
| XP_00402130<br>9.2      | 2.36 | 54 | 19 | 19 | Carbamidomethylation; Deamidation (NQ);<br>Dehydration; Formylation                                          | malate dehydrogenase mitochondrial [Ovis<br>aries]                                      |
| XP_00402091<br>3.1      | 1.01 | 31 | 28 | 19 | Carbamidomethylation; Deamidation (NQ);<br>Oxidation (M)                                                     | sarcoplasmic/endoplasmic reticulum calcium<br>ATPase 1 isoform X1 [Ovis aries]          |
| W5NVR1 W5<br>NVR1_SHEEP | 1.01 | 32 | 28 | 19 | Carbamidomethylation; Deamidation (NQ);<br>Oxidation (M)                                                     | Calcium-transporting ATPase OS=Ovis aries<br>OX=9940 GN=ATP2A1 PE=3 SV=1                |
| XP_00402091<br>2.1      | 1.01 | 31 | 28 | 19 | Carbamidomethylation; Deamidation (NQ);<br>Oxidation (M)                                                     | sarcoplasmic/endoplasmic reticulum calcium<br>ATPase 1 isoform X2 [Ovis aries]          |
| XP_02782373<br>6.1      | 0.89 | 76 | 19 | 19 | Carbamidomethylation; Deamidation (NQ)                                                                       | triosephosphate isomerase [Ovis aries]                                                  |
| XP_01203028<br>9.1      | 1.38 | 15 | 19 | 18 | Carbamidomethylation; Deamidation (NQ);<br>Oxidation (M); Dehydration; Formylation                           | myosin-binding protein C slow-type<br>isoform X2 [Ovis aries]                           |
| XP_01203028<br>8.1      | 1.38 | 15 | 19 | 18 | Carbamidomethylation; Deamidation (NQ);<br>Oxidation (M); Dehydration; Formylation                           | myosin-binding protein C slow-type<br>isoform X1 [Ovis aries]                           |
| XP_00400910<br>6.3      | 2.67 | 50 | 22 | 17 | Carbamidomethylation; Deamidation (NQ);<br>Oxidation (M); Phosphorylation (STY);<br>Dehydration; Formylation | creatine kinase S-type mitochondrial [Ovis<br>aries]                                    |
| W5P323 W5P<br>323_SHEEP | 3.18 | 45 | 16 | 16 | Deamidation (NQ); Oxidation (M)                                                                              | Glucose-6-phosphate isomerase OS=Ovis<br>aries OX=9940 GN=GPI PE=3 SV=1                 |
| XP_00401520<br>0.2      | 3.18 | 45 | 16 | 16 | Deamidation (NQ); Oxidation (M)                                                                              | glucose-6-phosphate isomerase [Ovis aries]                                              |
| XP_00402056<br>9.1      | 0.59 | 37 | 16 | 16 | Deamidation (NQ)                                                                                             | ATP synthase subunit alpha mitochondrial<br>[Ovis aries]                                |

|                             |      |    |    |    |                                                                                                         |                                                                                   |
|-----------------------------|------|----|----|----|---------------------------------------------------------------------------------------------------------|-----------------------------------------------------------------------------------|
| A0A3Q9U3M0 A0A3Q9U3M0_SHEEP | 4.03 | 25 | 16 | 14 | Carbamidomethylation; Deamidation (NQ);<br>Oxidation (M); Pyro-glu from Q                               | ATP-dependent 6-phosphofructokinase<br>OS=Ovis aries OX=9940 GN=PFKM PE=2<br>SV=1 |
| XP_004006455.2              | 4.03 | 25 | 16 | 14 | Carbamidomethylation; Deamidation (NQ);<br>Oxidation (M); Pyro-glu from Q                               | LOW QUALITY PROTEIN: ATP-dependent 6-phosphofructokinase muscle type [Ovis aries] |
| W5QDD4 W5QDD4_SHEEP         | 4.03 | 25 | 16 | 14 | Carbamidomethylation; Deamidation (NQ);<br>Oxidation (M); Pyro-glu from Q                               | ATP-dependent 6-phosphofructokinase<br>OS=Ovis aries OX=9940 GN=PFKM PE=3<br>SV=1 |
| XP_004002712.1              | 1.99 | 48 | 14 | 14 | Deamidation (NQ); Dehydration                                                                           | calsequestrin-1 [Ovis aries]                                                      |
| XP_014953428.1              | 1.04 | 66 | 14 | 14 | Carbamidomethylation; Deamidation (NQ)                                                                  | carbonic anhydrase 3 [Ovis aries]                                                 |
| XP_027823951.1              | 2.52 | 23 | 13 | 13 | Deamidation (NQ); Pyro-glu from Q                                                                       | aconitate hydratase mitochondrial [Ovis aries]                                    |
| NP_001159670.1              | 1.53 | 46 | 13 | 13 | Carbamidomethylation; Deamidation (NQ)                                                                  | four and a half LIM domains protein 1 [Ovis aries]                                |
| XP_027818556.1              | 1.53 | 48 | 13 | 13 | Carbamidomethylation; Deamidation (NQ)                                                                  | four and a half LIM domains protein 1 isoform X3 [Ovis aries]                     |
| XP_027815619.1              | 0.57 | 61 | 17 | 13 | Carbamidomethylation; Deamidation (NQ); Pyro-glu from Q                                                 | L-lactate dehydrogenase A chain isoform X1 [Ovis aries]                           |
| W5PDD8 W5PDD8_SHEEP         | 4.13 | 55 | 12 | 12 | Deamidation (NQ)                                                                                        | Myozenin 1 OS=Ovis aries OX=9940<br>GN=MYOZ1 PE=4 SV=1                            |
| XP_027817273.1              | 3.8  | 83 | 12 | 12 | Pyro-glu from Q                                                                                         | heat shock protein beta-1 [Ovis aries]                                            |
| XP_004015091.1              | 3.94 | 29 | 10 | 10 | Carbamidomethylation; Deamidation (NQ)                                                                  | aspartate aminotransferase mitochondrial [Ovis aries]                             |
| XP_004020149.1              | 1.21 | 31 | 10 | 10 | Carbamidomethylation; Deamidation (NQ)                                                                  | aspartate aminotransferase cytoplasmic [Ovis aries]                               |
| XP_004004324.1              | 0.97 | 58 | 27 | 10 | Carbamidomethylation; Dehydration; Pyro-glu from Q                                                      | tropomyosin beta chain isoform X1 [Ovis aries]                                    |
| W5PVY5 W5PVY5_SHEEP         | 0.94 | 68 | 15 | 10 | Carbamidomethylation; Deamidation (NQ);<br>Oxidation (M)                                                | Phosphoglycerate mutase OS=Ovis aries<br>OX=9940 GN=PGAM2 PE=3 SV=1               |
| NP_001155354.1              | 0.29 | 63 | 11 | 10 | Carbamidomethylation; Deamidation (NQ);<br>Oxidation (M)                                                | adenylate kinase isoenzyme 1 [Ovis aries]                                         |
| XP_011955483.2              | 2.01 | 27 | 9  | 9  | Carbamidomethylation; Deamidation (NQ)                                                                  | cytochrome b-c1 complex subunit 1 mitochondrial [Ovis aries]                      |
| XP_004004940.1              | 1.21 | 85 | 34 | 9  | Carbamidomethylation; Deamidation (NQ);<br>Oxidation (M); Phosphorylation (STY);<br>Dehydration; 2 more | myosin light chain 1/3 skeletal muscle isoform isoform X1 [Ovis aries]            |
| XP_004018103.4              | 0.86 | 25 | 9  | 9  | Carbamidomethylation; Deamidation (NQ)                                                                  | isocitrate dehydrogenase [NADP] mitochondrial [Ovis aries]                        |

|                         |      |    |     |   |                                                                                                                  |                                                                                |
|-------------------------|------|----|-----|---|------------------------------------------------------------------------------------------------------------------|--------------------------------------------------------------------------------|
| W5PR04 W5P<br>R04_SHEEP | 0.86 | 26 | 9   | 9 | Carbamidomethylation; Deamidation (NQ)                                                                           | Isocitrate dehydrogenase [NADP] OS=Ovis aries OX=9940 GN=IDH2 PE=3 SV=1        |
| XP_02783215<br>2.1      | 0.73 | 80 | 10  | 9 | Carbamidomethylation; Deamidation (NQ);<br>Oxidation (M)                                                         | troponin C skeletal muscle isoform X1<br>[Ovis aries]                          |
| XP_00400466<br>8.2      | 0.6  | 12 | 9   | 9 | Carbamidomethylation; Deamidation (NQ)                                                                           | kelch-like protein 41 [Ovis aries]                                             |
| W5NZL8 W5<br>NZL8_SHEEP | 0.6  | 12 | 9   | 9 | Carbamidomethylation; Deamidation (NQ)                                                                           | Kelch like family member 41 OS=Ovis aries OX=9940 GN=KLHL41 PE=4 SV=1          |
| W5PI38 W5PI<br>38_SHEEP | 0.11 | 20 | 9   | 9 | Carbamidomethylation                                                                                             | Citrate synthase OS=Ovis aries OX=9940 GN=CS PE=3 SV=1                         |
| XP_00400663<br>3.1      | 0.11 | 20 | 9   | 9 | Carbamidomethylation                                                                                             | citrate synthase mitochondrial [Ovis aries]                                    |
| XP_00401745<br>8.1      | 2.63 | 20 | 8   | 8 | Carbamidomethylation                                                                                             | aldehyde dehydrogenase mitochondrial<br>[Ovis aries]                           |
| XP_02781515<br>0.1      | 2.38 | 50 | 8   | 8 | Carbamidomethylation; Deamidation (NQ)                                                                           | phosphatidylethanolamine-binding protein 1<br>[Ovis aries]                     |
| XP_02781785<br>1.1      | 5.03 | 77 | 30  | 7 | Carbamidomethylation; Deamidation (NQ);<br>Oxidation (M); Phosphorylation (STY);<br>Dehydration; Pyro-glu from Q | fructose-bisphosphate aldolase A [Ovis aries]                                  |
| XP_02781566<br>7.1      | 3.62 | 44 | 10  | 7 | Carbamidomethylation; Deamidation (NQ);<br>Oxidation (M); Phosphorylation (STY); Pyro-glu<br>from Q; 2 more      | troponin I fast skeletal muscle [Ovis aries]                                   |
| XP_02782495<br>9.1      | 1.43 | 30 | 7   | 7 | Carbamidomethylation; Deamidation (NQ)                                                                           | voltage-dependent anion-selective channel<br>protein 1 isoform X1 [Ovis aries] |
| XP_00401523<br>8.1      | 1.05 | 67 | 7   | 7 | Carbamidomethylation                                                                                             | cytochrome c oxidase subunit 6B1 [Ovis<br>aries]                               |
| XP_02783068<br>7.1      | 0.96 | 42 | 135 | 7 | Carbamidomethylation; Deamidation (NQ);<br>Oxidation (M); Phosphorylation (STY);<br>Dehydration; 2 more          | myosin-8 [Ovis aries]                                                          |
| XP_02783198<br>0.1      | 0.47 | 20 | 7   | 7 | Carbamidomethylation; Deamidation (NQ)                                                                           | myosin-binding protein H [Ovis aries]                                          |
| XP_00402087<br>9.1      | 0.23 | 23 | 7   | 7 | Carbamidomethylation; Deamidation (NQ); Pyro-<br>glu from Q                                                      | cytochrome b-c1 complex subunit 2<br>mitochondrial [Ovis aries]                |
| XP_02781709<br>4.1      | 0.14 | 20 | 7   | 7 | Carbamidomethylation                                                                                             | tripartite motif-containing protein 72 [Ovis<br>aries]                         |
| W5Q0R4 W5<br>Q0R4_SHEEP | 3.54 | 37 | 6   | 6 | Deamidation (NQ); Pyro-glu from Q                                                                                | Alpha-crystallin B chain OS=Ovis aries OX=9940 GN=CRYAB PE=3 SV=1              |
| W5PF65 W5P<br>F65_SHEEP | 3.17 | 9  | 6   | 6 | Carbamidomethylation                                                                                             | Transferrin OS=Ovis aries OX=9940 GN=TF PE=3 SV=1                              |
| XP_02781611<br>1.1      | 3.17 | 9  | 6   | 6 | Carbamidomethylation                                                                                             | serotransferrin [Ovis aries]                                                   |

|                         |      |    |    |   |                                                                                                         |                                                                                      |
|-------------------------|------|----|----|---|---------------------------------------------------------------------------------------------------------|--------------------------------------------------------------------------------------|
| XP_02782155<br>9.1      | 3.13 | 48 | 6  | 6 | Carbamidomethylation; Deamidation (NQ)                                                                  | galectin-1 isoform X1 [Ovis aries]                                                   |
| W5PWZ2 W5<br>PWZ2_SHEEP | 3.13 | 60 | 6  | 6 | Carbamidomethylation; Deamidation (NQ)                                                                  | Galectin OS=Ovis aries OX=9940<br>GN=LGALS1 PE=4 SV=1                                |
| W5PFT7 W5P<br>FT7_SHEEP | 3.01 | 35 | 6  | 6 | Carbamidomethylation; Deamidation (NQ)                                                                  | Fructose-bisphosphatase 2 OS=Ovis aries<br>OX=9940 GN=FBP2 PE=3 SV=1                 |
| NP_00111982<br>3.1      | 2.79 | 71 | 32 | 6 | Carbamidomethylation; Deamidation (NQ);<br>Oxidation (M); Phosphorylation (STY);<br>Dehydration; 2 more | tropomyosin alpha-1 chain [Ovis aries]                                               |
| W5Q8N4 W5<br>Q8N4_SHEEP | 2.19 | 51 | 6  | 6 | Deamidation (NQ)                                                                                        | Myosin light chain 2 OS=Ovis aries<br>OX=9940 GN=MYL2 PE=2 SV=1                      |
| W5PP37 W5P<br>P37_SHEEP | 1.55 | 45 | 6  | 6 | Carbamidomethylation                                                                                    | ATP synthase subunit d mitochondrial<br>OS=Ovis aries OX=9940 GN=ATP5PD<br>PE=3 SV=1 |
| NP_00113636<br>3.1      | 1.55 | 45 | 6  | 6 | Carbamidomethylation                                                                                    | ATP synthase subunit d mitochondrial<br>[Ovis aries]                                 |
| XP_02782049<br>1.1      | 1.54 | 17 | 6  | 6 | Deamidation (NQ)                                                                                        | myc box-dependent-interacting protein 1<br>isoform X10 [Ovis aries]                  |
| XP_02782048<br>3.1      | 1.54 | 15 | 6  | 6 | Deamidation (NQ)                                                                                        | myc box-dependent-interacting protein 1<br>isoform X2 [Ovis aries]                   |
| XP_02782050<br>1.1      | 1.54 | 20 | 6  | 6 | Deamidation (NQ)                                                                                        | myc box-dependent-interacting protein 1<br>isoform X20 [Ovis aries]                  |
| XP_02782049<br>2.1      | 1.54 | 18 | 6  | 6 | Deamidation (NQ)                                                                                        | myc box-dependent-interacting protein 1<br>isoform X11 [Ovis aries]                  |
| XP_02782049<br>8.1      | 1.54 | 19 | 6  | 6 | Deamidation (NQ)                                                                                        | myc box-dependent-interacting protein 1<br>isoform X17 [Ovis aries]                  |
| XP_02782048<br>8.1      | 1.54 | 17 | 6  | 6 | Deamidation (NQ)                                                                                        | myc box-dependent-interacting protein 1<br>isoform X7 [Ovis aries]                   |
| XP_02782048<br>4.1      | 1.54 | 16 | 6  | 6 | Deamidation (NQ)                                                                                        | myc box-dependent-interacting protein 1<br>isoform X3 [Ovis aries]                   |
| XP_02782048<br>2.1      | 1.54 | 15 | 6  | 6 | Deamidation (NQ)                                                                                        | myc box-dependent-interacting protein 1<br>isoform X1 [Ovis aries]                   |
| XP_02782049<br>9.1      | 1.54 | 19 | 6  | 6 | Deamidation (NQ)                                                                                        | myc box-dependent-interacting protein 1<br>isoform X18 [Ovis aries]                  |
| XP_02782048<br>9.1      | 1.54 | 17 | 6  | 6 | Deamidation (NQ)                                                                                        | myc box-dependent-interacting protein 1<br>isoform X8 [Ovis aries]                   |
| XP_02782049<br>5.1      | 1.54 | 18 | 6  | 6 | Deamidation (NQ)                                                                                        | myc box-dependent-interacting protein 1<br>isoform X14 [Ovis aries]                  |
| XP_02782049<br>6.1      | 1.54 | 18 | 6  | 6 | Deamidation (NQ)                                                                                        | myc box-dependent-interacting protein 1<br>isoform X15 [Ovis aries]                  |
| XP_02782049<br>0.1      | 1.54 | 17 | 6  | 6 | Deamidation (NQ)                                                                                        | myc box-dependent-interacting protein 1<br>isoform X9 [Ovis aries]                   |

|                         |      |    |     |   |                                                                                                         |                                                                                                                                        |
|-------------------------|------|----|-----|---|---------------------------------------------------------------------------------------------------------|----------------------------------------------------------------------------------------------------------------------------------------|
| XP_02782048<br>5.1      | 1.54 | 16 | 6   | 6 | Deamidation (NQ)                                                                                        | myc box-dependent-interacting protein 1<br>isoform X4 [Ovis aries]                                                                     |
| XP_02782050<br>4.1      | 1.54 | 21 | 6   | 6 | Deamidation (NQ)                                                                                        | myc box-dependent-interacting protein 1<br>isoform X23 [Ovis aries]                                                                    |
| XP_02782049<br>7.1      | 1.54 | 19 | 6   | 6 | Deamidation (NQ)                                                                                        | myc box-dependent-interacting protein 1<br>isoform X16 [Ovis aries]                                                                    |
| XP_02782050<br>2.1      | 1.54 | 20 | 6   | 6 | Deamidation (NQ)                                                                                        | myc box-dependent-interacting protein 1<br>isoform X21 [Ovis aries]                                                                    |
| XP_02782049<br>3.1      | 1.54 | 18 | 6   | 6 | Deamidation (NQ)                                                                                        | myc box-dependent-interacting protein 1<br>isoform X12 [Ovis aries]                                                                    |
| XP_02782048<br>7.1      | 1.54 | 17 | 6   | 6 | Deamidation (NQ)                                                                                        | myc box-dependent-interacting protein 1<br>isoform X6 [Ovis aries]                                                                     |
| XP_02782050<br>3.1      | 1.54 | 21 | 6   | 6 | Deamidation (NQ)                                                                                        | myc box-dependent-interacting protein 1<br>isoform X22 [Ovis aries]                                                                    |
| XP_02782049<br>4.1      | 1.54 | 18 | 6   | 6 | Deamidation (NQ)                                                                                        | myc box-dependent-interacting protein 1<br>isoform X13 [Ovis aries]                                                                    |
| XP_02782050<br>0.1      | 1.54 | 20 | 6   | 6 | Deamidation (NQ)                                                                                        | myc box-dependent-interacting protein 1<br>isoform X19 [Ovis aries]                                                                    |
| XP_02782059<br>4.1      | 1.11 | 28 | 754 | 6 | Carbamidomethylation; Deamidation (NQ);<br>Oxidation (M); Phosphorylation (STY);<br>Dehydration; 3 more | LOW QUALITY PROTEIN: titin [Ovis<br>aries]                                                                                             |
| XP_00401084<br>2.2      | 0.93 | 14 | 6   | 6 |                                                                                                         | dihydrolipoyllysine-residue<br>succinyltransferase component of 2-<br>oxoglutarate dehydrogenase complex<br>mitochondrial [Ovis aries] |
| W5NTS6 W5<br>NTS6_SHEEP | 0.93 | 14 | 6   | 6 |                                                                                                         | Dihydrolipoamide S-succinyltransferase<br>OS=Ovis aries OX=9940 GN=DLST PE=4<br>SV=1                                                   |
| XP_02782910<br>0.1      | 0.9  | 1  | 6   | 6 |                                                                                                         | plectin isoform X2 [Ovis aries]                                                                                                        |
| XP_02782909<br>9.1      | 0.9  | 1  | 6   | 6 |                                                                                                         | plectin isoform X1 [Ovis aries]                                                                                                        |
| XP_02782910<br>3.1      | 0.9  | 1  | 6   | 6 |                                                                                                         | plectin isoform X4 [Ovis aries]                                                                                                        |
| XP_02782910<br>2.1      | 0.9  | 1  | 6   | 6 |                                                                                                         | plectin isoform X3 [Ovis aries]                                                                                                        |
| W5QFQ1 W5<br>QFQ1_SHEEP | 0.71 | 22 | 6   | 6 | Carbamidomethylation; Deamidation (NQ)                                                                  | Malate dehydrogenase OS=Ovis aries<br>OX=9940 GN=MDH1 PE=3 SV=1                                                                        |
| W5QFQ0 W5<br>QFQ0_SHEEP | 0.71 | 23 | 6   | 6 | Carbamidomethylation; Deamidation (NQ)                                                                  | Malate dehydrogenase OS=Ovis aries<br>OX=9940 GN=MDH1 PE=3 SV=1                                                                        |
| XP_00400589<br>4.2      | 0.71 | 23 | 6   | 6 | Carbamidomethylation; Deamidation (NQ)                                                                  | malate dehydrogenase cytoplasmic [Ovis<br>aries]                                                                                       |

|                         |      |    |    |   |                                                                                                         |                                                                                                 |
|-------------------------|------|----|----|---|---------------------------------------------------------------------------------------------------------|-------------------------------------------------------------------------------------------------|
| XP_02783050<br>4.1      | 0.66 | 24 | 6  | 6 | Deamidation (NQ)                                                                                        | tropomodulin-4 [Ovis aries]                                                                     |
| NP_00113865<br>5.1      | 0.64 | 85 | 36 | 6 | Carbamidomethylation; Deamidation (NQ);<br>Oxidation (M); Phosphorylation (STY);<br>Dehydration; 3 more | myosin regulatory light chain 2 skeletal<br>muscle isoform [Ovis aries]                         |
| XP_00402200<br>2.1      | 4.45 | 24 | 5  | 5 | Carbamidomethylation; Deamidation (NQ)                                                                  | pyruvate dehydrogenase E1 component<br>subunit alpha somatic form mitochondrial<br>[Ovis aries] |
| W5PIG6 W5PI<br>G6_SHEEP | 4.31 | 40 | 15 | 5 | Carbamidomethylation; Deamidation (NQ);<br>Oxidation (M); Phosphorylation (STY);<br>Dehydration         | Enolase 1 OS=Ovis aries OX=9940<br>GN=ENO1 PE=3 SV=1                                            |
| XP_02783147<br>5.1      | 4.31 | 42 | 15 | 5 | Carbamidomethylation; Deamidation (NQ);<br>Oxidation (M); Phosphorylation (STY);<br>Dehydration         | alpha-enolase isoform X2 [Ovis aries]                                                           |
| XP_00400240<br>6.2      | 3.43 | 7  | 5  | 5 |                                                                                                         | AMP deaminase 1 isoform X1 [Ovis aries]                                                         |
| XP_00400240<br>7.1      | 3.43 | 7  | 5  | 5 |                                                                                                         | AMP deaminase 1 isoform X2 [Ovis aries]                                                         |
| W5QFJ2 W5Q<br>FJ2_SHEEP | 3.43 | 7  | 5  | 5 |                                                                                                         | AMP deaminase OS=Ovis aries OX=9940<br>GN=AMPD1 PE=3 SV=1                                       |
| W5PNI5 W5P<br>NI5_SHEEP | 3.28 | 8  | 16 | 5 | Carbamidomethylation; Deamidation (NQ);<br>Formylation                                                  | Myosin heavy chain 7B OS=Ovis aries<br>OX=9940 GN=MYH7B PE=3 SV=1                               |
| sp P62896 CY<br>C_SHEEP | 2.02 | 50 | 6  | 5 |                                                                                                         | Cytochrome c OS=Ovis aries OX=9940<br>GN=CYCS PE=1 SV=2                                         |
| XP_01198204<br>2.2      | 1.54 | 22 | 5  | 5 | Pyro-glu from Q                                                                                         | peroxiredoxin-1 [Ovis aries]                                                                    |
| XP_00400209<br>0.1      | 1.06 | 66 | 31 | 5 | Carbamidomethylation; Deamidation (NQ);<br>Oxidation (M); Pyro-glu from Q                               | phosphoglucosyltransferase-1 isoform X2 [Ovis<br>aries]                                         |
| XP_00400777<br>5.1      | 1.04 | 4  | 5  | 5 |                                                                                                         | collagen alpha-2(I) chain [Ovis aries]                                                          |
| XP_02781297<br>6.1      | 0.91 | 54 | 5  | 5 | Deamidation (NQ)                                                                                        | cytochrome c oxidase subunit 5A<br>mitochondrial [Ovis aries]                                   |
| W5NXT8 W5<br>NXT8_SHEEP | 0.91 | 68 | 5  | 5 | Deamidation (NQ)                                                                                        | Cytochrome c oxidase subunit 5A OS=Ovis<br>aries OX=9940 GN=COX5A PE=1 SV=1                     |
| XP_00401379<br>8.1      | 0.57 | 38 | 5  | 5 | Carbamidomethylation                                                                                    | protein/nucleic acid deglycase DJ-1 [Ovis<br>aries]                                             |
| sp P02190 MY<br>G_SHEEP | 5.91 | 62 | 16 | 4 | Deamidation (NQ); Oxidation (M); Dehydration;<br>Formylation                                            | Myoglobin OS=Ovis aries OX=9940<br>GN=MB PE=1 SV=2                                              |
| XP_02781834<br>8.1      | 4.14 | 18 | 4  | 4 | Carbamidomethylation                                                                                    | PDZ and LIM domain protein 3 isoform X2<br>[Ovis aries]                                         |

|                                     |      |    |    |   |                                                                                                         |                                                                                                                |
|-------------------------------------|------|----|----|---|---------------------------------------------------------------------------------------------------------|----------------------------------------------------------------------------------------------------------------|
| XP_02782742<br>2.1                  | 2.47 | 37 | 89 | 4 | Carbamidomethylation; Deamidation (NQ);<br>Oxidation (M); Phosphorylation (STY);<br>Dehydration; 2 more | myosin-6 isoform X2 [Ovis aries]                                                                               |
| A0A1X9H6E5<br> A0A1X9H6E<br>5_SHEEP | 2.32 | 21 | 4  | 4 | Carbamidomethylation                                                                                    | Troponin I type 1 variant X2 OS=Ovis aries<br>OX=9940 GN=TNNI1 PE=2 SV=1                                       |
| XP_02783185<br>4.1                  | 2.32 | 22 | 4  | 4 | Carbamidomethylation                                                                                    | troponin I slow skeletal muscle [Ovis aries]                                                                   |
| W5PEA4 W5P<br>EA4_SHEEP             | 1.89 | 8  | 4  | 4 | Carbamidomethylation                                                                                    | Succinate--CoA ligase [ADP-forming]<br>subunit beta mitochondrial OS=Ovis aries<br>OX=9940 GN=SUCLA2 PE=3 SV=1 |
| W5PEA2 W5P<br>EA2_SHEEP             | 1.89 | 7  | 4  | 4 | Carbamidomethylation                                                                                    | Succinate--CoA ligase [ADP-forming]<br>subunit beta mitochondrial OS=Ovis aries<br>OX=9940 GN=SUCLA2 PE=3 SV=1 |
| XP_02782936<br>0.1                  | 1.89 | 8  | 4  | 4 | Carbamidomethylation                                                                                    | succinate--CoA ligase [ADP-forming]<br>subunit beta mitochondrial [Ovis aries]                                 |
| W5PH95 W5P<br>H95_SHEEP             | 1.18 | 21 | 4  | 4 | Carbamidomethylation; Deamidation (NQ)                                                                  | Uncharacterized protein OS=Ovis aries<br>OX=9940 PE=4 SV=1                                                     |
| XP_02781769<br>9.1                  | 0.98 | 6  | 4  | 4 |                                                                                                         | sarcalumenin isoform X1 [Ovis aries]                                                                           |
| W5NYM5 W5<br>NYM5_SHEE<br>P         | 0.98 | 6  | 4  | 4 |                                                                                                         | Sarcalumenin OS=Ovis aries OX=9940<br>GN=SRL PE=3 SV=1                                                         |
| XP_00402120<br>1.1                  | 0.98 | 11 | 4  | 4 |                                                                                                         | sarcalumenin isoform X2 [Ovis aries]                                                                           |
| XP_00400780<br>2.1                  | 0.82 | 46 | 4  | 4 |                                                                                                         | cytochrome c oxidase subunit NDUF44<br>[Ovis aries]                                                            |
| NP_00109111<br>7.1                  | 0.79 | 86 | 12 | 4 | Carbamidomethylation; Deamidation (NQ)                                                                  | hemoglobin subunit beta [Ovis aries]                                                                           |
| XP_01203883<br>3.2                  | 0.52 | 18 | 4  | 4 | Carbamidomethylation; Deamidation (NQ)                                                                  | cytochrome c1 heme protein<br>mitochondrial [Ovis aries]                                                       |
| NP_00113865<br>9.1                  | 0.45 | 59 | 4  | 4 | Carbamidomethylation                                                                                    | cytochrome b-c1 complex subunit 6<br>mitochondrial [Ovis aries]                                                |
| W5NPN4 W5<br>NPN4_SHEEP             | 0.26 | 18 | 9  | 4 | Carbamidomethylation; Deamidation (NQ)                                                                  | Heat shock protein family A (Hsp70)<br>member 8 OS=Ovis aries OX=9940<br>GN=HSPA8 PE=3 SV=1                    |
| XP_01195102<br>3.2                  | 0.26 | 18 | 9  | 4 | Carbamidomethylation; Deamidation (NQ)                                                                  | heat shock cognate 71 kDa protein [Ovis<br>aries]                                                              |
| NP_00115536<br>3.1                  | 0.26 | 15 | 4  | 4 | Deamidation (NQ)                                                                                        | fumarate hydratase mitochondrial [Ovis<br>aries]                                                               |
| XP_02783350<br>8.1                  | 0.01 | 20 | 4  | 4 |                                                                                                         | cytochrome c oxidase subunit 4 isoform 1<br>mitochondrial [Ovis aries]                                         |



|                         |       |    |   |   |                                                        |                                                                                                                      |
|-------------------------|-------|----|---|---|--------------------------------------------------------|----------------------------------------------------------------------------------------------------------------------|
| W5PPE8 W5P<br>PE8_SHEEP | 0.01  | 20 | 4 | 4 |                                                        | Cytochrome c oxidase subunit 4I1 OS=Ovis aries OX=9940 GN=COX4I1 PE=1 SV=1                                           |
| W5PAN7 W5P<br>AN7_SHEEP | 0     | 33 | 6 | 4 | Carbamidomethylation; Deamidation (NQ);<br>Dehydration | Myosin light chain 3 OS=Ovis aries OX=9940 GN=MYL3 PE=4 SV=1                                                         |
| XP_02781353<br>0.1      | 0     | 33 | 6 | 4 | Carbamidomethylation; Deamidation (NQ);<br>Dehydration | myosin light chain 3 [Ovis aries]                                                                                    |
| XP_02783601<br>3.1      | 14.12 | 9  | 3 | 3 | Carbamidomethylation; Deamidation (NQ)                 | succinate dehydrogenase [ubiquinone] flavoprotein subunit mitochondrial [Ovis aries]                                 |
| W5Q216 W5Q<br>216_SHEEP | 14.12 | 9  | 3 | 3 | Carbamidomethylation; Deamidation (NQ)                 | Succinate dehydrogenase [ubiquinone] flavoprotein subunit mitochondrial OS=Ovis aries OX=9940 PE=3 SV=1              |
| XP_01195084<br>4.2      | 4.38  | 10 | 3 | 3 | Carbamidomethylation; Deamidation (NQ)                 | dihydrolipoyllysine-residue acetyltransferase component of pyruvate dehydrogenase complex mitochondrial [Ovis aries] |
| W5Q2C5 W5<br>Q2C5_SHEEP | 4.38  | 10 | 3 | 3 | Carbamidomethylation; Deamidation (NQ)                 | Acetyltransferase component of pyruvate dehydrogenase complex OS=Ovis aries OX=9940 PE=3 SV=1                        |
| XP_00400802<br>8.1      | 4.37  | 3  | 3 | 3 |                                                        | 2-oxoglutarate dehydrogenase mitochondrial isoform X4 [Ovis aries]                                                   |
| XP_00400802<br>7.1      | 4.37  | 3  | 3 | 3 |                                                        | 2-oxoglutarate dehydrogenase mitochondrial isoform X3 [Ovis aries]                                                   |
| XP_01203235<br>5.1      | 4.37  | 3  | 3 | 3 |                                                        | 2-oxoglutarate dehydrogenase mitochondrial isoform X2 [Ovis aries]                                                   |
| XP_01203235<br>4.1      | 4.37  | 3  | 3 | 3 |                                                        | 2-oxoglutarate dehydrogenase mitochondrial isoform X1 [Ovis aries]                                                   |
| XP_02783274<br>6.1      | 3.91  | 15 | 5 | 3 | Deamidation (NQ)                                       | elongation factor 1-alpha 2 [Ovis aries]                                                                             |
| W5PN24 W5P<br>N24_SHEEP | 3.91  | 14 | 5 | 3 | Deamidation (NQ)                                       | Eukaryotic translation elongation factor 1 alpha 2 OS=Ovis aries OX=9940 GN=EEF1A2 PE=3 SV=1                         |
| XP_00400888<br>9.1      | 3.68  | 6  | 3 | 3 |                                                        | stress-70 protein mitochondrial [Ovis aries]                                                                         |
| XP_02781321<br>7.1      | 3.3   | 4  | 3 | 3 |                                                        | heat shock protein HSP 90-alpha [Ovis aries]                                                                         |
| XP_00400974<br>1.1      | 2.15  | 14 | 3 | 3 |                                                        | PDZ and LIM domain protein 5 isoform X7 [Ovis aries]                                                                 |
| XP_02782667<br>1.1      | 2.15  | 7  | 3 | 3 |                                                        | PDZ and LIM domain protein 5 isoform X4 [Ovis aries]                                                                 |
| XP_00400974<br>0.1      | 2.15  | 13 | 3 | 3 |                                                        | PDZ and LIM domain protein 5 isoform X6 [Ovis aries]                                                                 |

|                             |      |    |     |   |                                                                                                         |                                                                                    |
|-----------------------------|------|----|-----|---|---------------------------------------------------------------------------------------------------------|------------------------------------------------------------------------------------|
| XP_00400974<br>4.1          | 2.15 | 6  | 3   | 3 |                                                                                                         | PDZ and LIM domain protein 5 isoform X3<br>[Ovis aries]                            |
| XP_00400974<br>8.1          | 2.15 | 6  | 3   | 3 |                                                                                                         | PDZ and LIM domain protein 5 isoform X2<br>[Ovis aries]                            |
| XP_00400973<br>9.1          | 2.15 | 5  | 3   | 3 |                                                                                                         | PDZ and LIM domain protein 5 isoform X1<br>[Ovis aries]                            |
| XP_00402139<br>0.1          | 1.87 | 76 | 54  | 3 | Carbamidomethylation; Deamidation (NQ);<br>Oxidation (M); Phosphorylation (STY);<br>Dehydration; 3 more | actin alpha skeletal muscle isoform X4<br>[Ovis aries]                             |
| XP_02781324<br>6.1          | 1.61 | 22 | 7   | 3 | Carbamidomethylation; Deamidation (NQ);<br>Phosphorylation (STY); Formylation                           | creatine kinase B-type [Ovis aries]                                                |
| XP_01195930<br>4.1          | 1.47 | 99 | 33  | 3 | Carbamidomethylation; Deamidation (NQ);<br>Oxidation (M); Dehydration; Pyro-glu from Q; 2<br>more       | myosin regulatory light chain 2 skeletal<br>muscle isoform isoform X1 [Ovis aries] |
| XP_02783068<br>5.1          | 1.02 | 61 | 199 | 3 | Carbamidomethylation; Deamidation (NQ);<br>Oxidation (M); Phosphorylation (STY);<br>Dehydration; 3 more | LOW QUALITY PROTEIN: myosin-2 [Ovis<br>aries]                                      |
| NP_00112075<br>0.1          | 0.92 | 29 | 10  | 3 | Deamidation (NQ)                                                                                        | ADP/ATP translocase 1 [Ovis aries]                                                 |
| XP_01495805<br>1.2          | 0.76 | 9  | 3   | 3 |                                                                                                         | uncharacterized protein LOC101108868<br>[Ovis aries]                               |
| XP_02782054<br>3.1          | 0.76 | 14 | 3   | 3 |                                                                                                         | uncharacterized protein LOC114113063<br>[Ovis aries]                               |
| XP_02781490<br>0.1          | 0.76 | 9  | 3   | 3 |                                                                                                         | uncharacterized protein LOC101120961<br>[Ovis aries]                               |
| W5QFN7 W5<br>QFN7_SHEEP     | 0.76 | 27 | 3   | 3 |                                                                                                         | Histone H4 OS=Ovis aries OX=9940 PE=3<br>SV=1                                      |
| W5QFN8 W5<br>QFN8_SHEEP     | 0.76 | 27 | 3   | 3 |                                                                                                         | Histone H4 OS=Ovis aries OX=9940 PE=3<br>SV=1                                      |
| W5QFP4 W5Q<br>FP4_SHEEP     | 0.76 | 28 | 3   | 3 |                                                                                                         | Histone H4 OS=Ovis aries OX=9940 PE=3<br>SV=1                                      |
| W5PHH3 W5P<br>HH3_SHEEP     | 0.76 | 28 | 3   | 3 |                                                                                                         | Histone H4 OS=Ovis aries OX=9940 PE=3<br>SV=1                                      |
| W5PHL0 W5P<br>HL0_SHEEP     | 0.76 | 28 | 3   | 3 |                                                                                                         | Histone H4 OS=Ovis aries OX=9940 PE=3<br>SV=1                                      |
| W5QFR6 W5<br>QFR6_SHEEP     | 0.76 | 28 | 3   | 3 |                                                                                                         | Histone H4 OS=Ovis aries OX=9940 PE=3<br>SV=1                                      |
| W5PHM4 W5<br>PHM4_SHEE<br>P | 0.76 | 27 | 3   | 3 |                                                                                                         | Histone H4 OS=Ovis aries OX=9940<br>GN=LOC101123670 PE=3 SV=1                      |
| W5QFN3 W5<br>QFN3_SHEEP     | 0.76 | 27 | 3   | 3 |                                                                                                         | Histone H4 OS=Ovis aries OX=9940 PE=3<br>SV=1                                      |

|                             |      |    |   |   |                                        |                                                                                  |
|-----------------------------|------|----|---|---|----------------------------------------|----------------------------------------------------------------------------------|
| XP_00400882<br>4.1          | 0.6  | 38 | 3 | 3 |                                        | ATP synthase subunit delta mitochondrial<br>[Ovis aries]                         |
| W5P642 W5P<br>642_SHEEP     | 0.36 | 26 | 3 | 3 |                                        | Cytochrome b-c1 complex subunit 7<br>OS=Ovis aries OX=9940 GN=UQCRB<br>PE=1 SV=1 |
| XP_02782900<br>5.1          | 0.36 | 25 | 3 | 3 |                                        | cytochrome b-c1 complex subunit 7 isoform<br>X1 [Ovis aries]                     |
| XP_00400247<br>2.1          | 0.35 | 20 | 3 | 3 |                                        | histone H2B type 2-F [Ovis aries]                                                |
| XP_00401912<br>5.1          | 0.35 | 20 | 3 | 3 |                                        | histone H2B type 1-M [Ovis aries]                                                |
| XP_00401907<br>6.1          | 0.35 | 20 | 3 | 3 |                                        | histone H2B type 1-N [Ovis aries]                                                |
| XP_02781488<br>6.1          | 0.35 | 20 | 3 | 3 |                                        | histone H2B type 1-K [Ovis aries]                                                |
| W5NRX3 W5<br>NRX3_SHEEP     | 0.35 | 19 | 3 | 3 |                                        | Histone H2B OS=Ovis aries OX=9940 PE=3<br>SV=1                                   |
| W5NS71 W5N<br>S71_SHEEP     | 0.35 | 18 | 3 | 3 |                                        | Histone H2B OS=Ovis aries OX=9940 PE=3<br>SV=1                                   |
| W5Q9Y2 W5<br>Q9Y2_SHEEP     | 0.35 | 18 | 3 | 3 |                                        | Histone H2B OS=Ovis aries OX=9940 PE=3<br>SV=1                                   |
| W5NR98 W5<br>NR98_SHEEP     | 0.35 | 18 | 3 | 3 |                                        | Histone H2B OS=Ovis aries OX=9940 PE=3<br>SV=1                                   |
| W5QAH2 W5<br>QAH2_SHEE<br>P | 0.35 | 18 | 3 | 3 |                                        | Histone H2B OS=Ovis aries OX=9940<br>GN=LOC101119426 PE=3 SV=1                   |
| W5NR06 W5<br>NR06_SHEEP     | 0.35 | 18 | 3 | 3 |                                        | Histone H2B OS=Ovis aries OX=9940 PE=3<br>SV=1                                   |
| W5QA24 W5<br>QA24_SHEEP     | 0.35 | 18 | 3 | 3 |                                        | Histone H2B OS=Ovis aries OX=9940 PE=3<br>SV=1                                   |
| W5QAW7 W5<br>QAW7_SHEE<br>P | 0.35 | 18 | 3 | 3 |                                        | Histone H2B OS=Ovis aries OX=9940 PE=3<br>SV=1                                   |
| XP_00401912<br>4.2          | 0.35 | 17 | 3 | 3 |                                        | histone H2B type 1 [Ovis aries]                                                  |
| W5QC76 W5<br>QC76_SHEEP     | 0.33 | 2  | 6 | 3 | Carbamidomethylation                   | Myosin heavy chain 15 OS=Ovis aries<br>OX=9940 GN=MYH15 PE=3 SV=1                |
| XP_02781706<br>3.1          | 0.29 | 4  | 3 | 3 |                                        | collagen alpha-2(VI) chain isoform X1 [Ovis<br>aries]                            |
| XP_00400571<br>6.1          | 0.22 | 20 | 3 | 3 | Carbamidomethylation; Deamidation (NQ) | NADH dehydrogenase [ubiquinone] 1 alpha<br>subcomplex subunit 8 [Ovis aries]     |

|                                     |      |    |    |   |                                                                                                              |                                                                                        |
|-------------------------------------|------|----|----|---|--------------------------------------------------------------------------------------------------------------|----------------------------------------------------------------------------------------|
| XP_02782086<br>3.1                  | 0.15 | 32 | 3  | 3 |                                                                                                              | 10 kDa heat shock protein mitochondrial isoform X2 [Ovis aries]                        |
| W5Q1T4 W5Q<br>1T4_SHEEP             | 0.15 | 32 | 3  | 3 |                                                                                                              | Uncharacterized protein OS=Ovis aries<br>OX=9940 PE=3 SV=1                             |
| A0A0H3V384 <br>A0A0H3V384<br>_SHEEP | 5.64 | 78 | 20 | 2 | Carbamidomethylation; Deamidation (NQ);<br>Oxidation (M); Phosphorylation (STY);<br>Dehydration; Formylation | Myosin light chain 1 OS=Ovis aries<br>OX=9940 GN=MYL1 PE=2 SV=1                        |
| XP_00400791<br>9.2                  | 5.04 | 13 | 2  | 2 |                                                                                                              | F-actin-capping protein subunit alpha-2<br>[Ovis aries]                                |
| W5PCG7 W5P<br>CG7_SHEEP             | 4.19 | 14 | 2  | 2 |                                                                                                              | Uncharacterized protein OS=Ovis aries<br>OX=9940 GN=MYOZ3 PE=4 SV=1                    |
| XP_02782307<br>1.1                  | 3.03 | 1  | 2  | 2 |                                                                                                              | LOW QUALITY PROTEIN: collagen alpha-<br>3(VI) chain [Ovis aries]                       |
| W5QCP9 W5<br>QCP9_SHEEP             | 3.03 | 1  | 2  | 2 |                                                                                                              | Collagen type VI alpha 3 chain OS=Ovis<br>aries OX=9940 GN=COL6A3 PE=4 SV=1            |
| XP_02781404<br>3.1                  | 2.9  | 8  | 2  | 2 | Carbamidomethylation; Deamidation (NQ)                                                                       | pyruvate dehydrogenase E1 component<br>subunit beta mitochondrial [Ovis aries]         |
| W5PRM8 W5<br>PRM8_SHEEP             | 2.9  | 8  | 2  | 2 | Carbamidomethylation; Deamidation (NQ)                                                                       | Pyruvate dehydrogenase E1 component<br>subunit beta OS=Ovis aries OX=9940 PE=4<br>SV=1 |
| W5PTW1 W5<br>PTW1_SHEEP             | 2.51 | 12 | 2  | 2 | Carbamidomethylation                                                                                         | Uncharacterized protein OS=Ovis aries<br>OX=9940 PE=3 SV=1                             |
| XP_02781527<br>2.1                  | 2.51 | 12 | 2  | 2 | Carbamidomethylation                                                                                         | glutathione S-transferase P [Ovis aries]                                               |
| W5NQP9 W5<br>NQP9_SHEEP             | 2.38 | 15 | 6  | 2 | Carbamidomethylation; Deamidation (NQ)                                                                       | Fructose-bisphosphate aldolase OS=Ovis<br>aries OX=9940 GN=ALDOC PE=3 SV=1             |
| XP_01495402<br>2.2                  | 2.38 | 19 | 6  | 2 | Carbamidomethylation; Deamidation (NQ)                                                                       | fructose-bisphosphate aldolase C [Ovis aries]                                          |
| XP_01195430<br>0.1                  | 2.16 | 11 | 7  | 2 | Carbamidomethylation; Deamidation (NQ);<br>Oxidation (M); Phosphorylation (STY);<br>Formylation              | creatine kinase U-type mitochondrial [Ovis<br>aries]                                   |
| XP_02782942<br>3.1                  | 1.93 | 12 | 2  | 2 | Deamidation (NQ)                                                                                             | ubiquitin-40S ribosomal protein S27a [Ovis<br>aries]                                   |
| sp P0C276 RL<br>40_SHEEP            | 1.93 | 20 | 2  | 2 | Deamidation (NQ)                                                                                             | Ubiquitin-60S ribosomal protein L40<br>OS=Ovis aries OX=9940 GN=UBA52 PE=2<br>SV=2     |
| W5Q9W5 W5<br>Q9W5_SHEE<br>P         | 1.93 | 5  | 2  | 2 | Deamidation (NQ)                                                                                             | Ubiquitin C OS=Ovis aries OX=9940<br>GN=UBC PE=4 SV=1                                  |
| XP_02781220<br>5.1                  | 1.93 | 3  | 2  | 2 | Deamidation (NQ)                                                                                             | LOW QUALITY PROTEIN: polyubiquitin-<br>C [Ovis aries]                                  |

|                          |      |    |    |   |                                                                                                         |                                                                                                                           |
|--------------------------|------|----|----|---|---------------------------------------------------------------------------------------------------------|---------------------------------------------------------------------------------------------------------------------------|
| XP_00400599<br>3.3       | 1.93 | 16 | 2  | 2 | Deamidation (NQ)                                                                                        | ubiquitin-40S ribosomal protein S27a [Ovis aries]                                                                         |
| sp P0CG55 UB<br>B_SHEEP  | 1.93 | 8  | 2  | 2 | Deamidation (NQ)                                                                                        | Polyubiquitin-B OS=Ovis aries OX=9940<br>GN=UBB PE=2 SV=1                                                                 |
| sp P09670 SO<br>DC_SHEEP | 1.64 | 24 | 2  | 2 | Deamidation (NQ)                                                                                        | Superoxide dismutase [Cu-Zn] OS=Ovis aries OX=9940 GN=SOD1 PE=1 SV=2                                                      |
| NP_00113865<br>7.1       | 1.64 | 24 | 2  | 2 | Deamidation (NQ)                                                                                        | superoxide dismutase [Cu-Zn] [Ovis aries]                                                                                 |
| W5QBF5 W5<br>QBF5_SHEEP  | 1.56 | 10 | 2  | 2 |                                                                                                         | NADH dehydrogenase [ubiquinone] 1 alpha subcomplex subunit 10 mitochondrial OS=Ovis aries OX=9940 GN=NDUFA10<br>PE=1 SV=1 |
| XP_00400180<br>8.2       | 1.56 | 10 | 2  | 2 |                                                                                                         | NADH dehydrogenase [ubiquinone] 1 alpha subcomplex subunit 10 mitochondrial isoform X1 [Ovis aries]                       |
| XP_02782283<br>7.1       | 1.56 | 11 | 2  | 2 |                                                                                                         | NADH dehydrogenase [ubiquinone] 1 alpha subcomplex subunit 10 mitochondrial isoform X2 [Ovis aries]                       |
| W5PEL7 W5P<br>EL7_SHEEP  | 1.4  | 1  | 2  | 2 |                                                                                                         | Heparan sulfate proteoglycan 2 OS=Ovis aries OX=9940 GN=HSPG2 PE=4 SV=1                                                   |
| XP_02782134<br>8.1       | 1.4  | 1  | 2  | 2 |                                                                                                         | LOW QUALITY PROTEIN: basement membrane-specific heparan sulfate proteoglycan core protein [Ovis aries]                    |
| XP_01495028<br>1.1       | 1.19 | 17 | 3  | 2 | Carbamidomethylation                                                                                    | myosin light chain 6B [Ovis aries]                                                                                        |
| XP_02781262<br>9.1       | 1.06 | 35 | 5  | 2 | Carbamidomethylation; Deamidation (NQ)                                                                  | immunoglobulin lambda-1 light chain-like [Ovis aries]                                                                     |
| XP_02783586<br>7.1       | 0.98 | 31 | 17 | 2 | Carbamidomethylation; Deamidation (NQ);<br>Oxidation (M); Phosphorylation (STY);<br>Dehydration; 2 more | beta-actin-like protein 2 isoform X2 [Ovis aries]                                                                         |
| XP_01203394<br>7.2       | 0.96 | 5  | 2  | 2 | Carbamidomethylation                                                                                    | myotilin isoform X2 [Ovis aries]                                                                                          |
| W5Q1Q5 W5<br>Q1Q5_SHEEP  | 0.96 | 5  | 2  | 2 | Carbamidomethylation                                                                                    | Myotilin OS=Ovis aries OX=9940<br>GN=MYOT PE=4 SV=1                                                                       |
| XP_00400886<br>9.2       | 0.96 | 5  | 2  | 2 | Carbamidomethylation                                                                                    | myotilin isoform X1 [Ovis aries]                                                                                          |
| XP_02783460<br>3.1       | 0.91 | 14 | 3  | 2 |                                                                                                         | troponin T slow skeletal muscle isoform X5 [Ovis aries]                                                                   |
| XP_01495560<br>0.2       | 0.91 | 14 | 3  | 2 |                                                                                                         | troponin T slow skeletal muscle isoform X4 [Ovis aries]                                                                   |
| XP_01195016<br>3.2       | 0.91 | 14 | 3  | 2 |                                                                                                         | troponin T slow skeletal muscle isoform X3 [Ovis aries]                                                                   |

|                                     |      |    |    |   |                                                                                                         |                                                                                                                     |
|-------------------------------------|------|----|----|---|---------------------------------------------------------------------------------------------------------|---------------------------------------------------------------------------------------------------------------------|
| XP_02783460<br>2.1                  | 0.91 | 14 | 3  | 2 |                                                                                                         | troponin T slow skeletal muscle isoform X2<br>[Ovis aries]                                                          |
| W5NUR7 W5<br>NUR7_SHEEP             | 0.91 | 13 | 3  | 2 |                                                                                                         | Troponin T1 slow skeletal type OS=Ovis<br>aries OX=9940 GN=TNNT1 PE=4 SV=1                                          |
| XP_02783460<br>1.1                  | 0.91 | 13 | 3  | 2 |                                                                                                         | troponin T slow skeletal muscle isoform X1<br>[Ovis aries]                                                          |
| A0A1X9H6F1 <br>A0A1X9H6F1<br>_SHEEP | 0.91 | 13 | 3  | 2 |                                                                                                         | Troponin T type 1 variant X1 OS=Ovis aries<br>OX=9940 GN=TNNT1 PE=2 SV=1                                            |
| XP_00401422<br>9.1                  | 0.79 | 8  | 2  | 2 |                                                                                                         | ATP synthase subunit gamma<br>mitochondrial isoform X1 [Ovis aries]                                                 |
| W5P340 W5P<br>340_SHEEP             | 0.74 | 13 | 2  | 2 |                                                                                                         | Superoxide dismutase OS=Ovis aries<br>OX=9940 PE=3 SV=1                                                             |
| NP_00126763<br>2.1                  | 0.74 | 13 | 2  | 2 |                                                                                                         | superoxide dismutase [Mn] mitochondrial<br>[Ovis aries]                                                             |
| W5PUX0 W5P<br>UX0_SHEEP             | 0.71 | 8  | 2  | 2 | Deamidation (NQ)                                                                                        | NADH dehydrogenase [ubiquinone]<br>flavoprotein 1 mitochondrial OS=Ovis aries<br>OX=9940 GN=NDUFV1 PE=1 SV=1        |
| XP_02781507<br>4.1                  | 0.71 | 8  | 2  | 2 | Deamidation (NQ)                                                                                        | NADH dehydrogenase [ubiquinone]<br>flavoprotein 1 mitochondrial [Ovis aries]                                        |
| XP_02781600<br>1.1                  | 0.66 | 23 | 2  | 2 |                                                                                                         | cytochrome c oxidase subunit 5B<br>mitochondrial [Ovis aries]                                                       |
| W5PSQ7 W5P<br>SQ7_SHEEP             | 0.52 | 30 | 5  | 2 | Carbamidomethylation; Deamidation (NQ)                                                                  | Uncharacterized protein OS=Ovis aries<br>OX=9940 PE=4 SV=1                                                          |
| XP_00402155<br>0.1                  | 0.37 | 7  | 2  | 2 |                                                                                                         | voltage-dependent anion-selective channel<br>protein 2 [Ovis aries]                                                 |
| W5QGQ8 W5<br>QGQ8_SHEE<br>P         | 0.35 | 7  | 2  | 2 | Carbamidomethylation                                                                                    | Succinate--CoA ligase [ADP/GDP-forming]<br>subunit alpha mitochondrial OS=Ovis aries<br>OX=9940 GN=SUCLG1 PE=3 SV=1 |
| XP_00400730<br>4.4                  | 0.35 | 8  | 2  | 2 | Carbamidomethylation                                                                                    | succinate--CoA ligase [ADP/GDP-forming]<br>subunit alpha mitochondrial [Ovis aries]                                 |
| XP_01495744<br>8.2                  | 0.31 | 5  | 2  | 2 |                                                                                                         | isocitrate dehydrogenase [NAD] subunit<br>alpha mitochondrial [Ovis aries]                                          |
| W5NR14 W5<br>NR14_SHEEP             | 0.31 | 5  | 2  | 2 |                                                                                                         | Isocitrate dehydrogenase [NAD] subunit<br>mitochondrial OS=Ovis aries OX=9940<br>GN=IDH3A PE=3 SV=1                 |
| XP_00401494<br>5.1                  | 0.25 | 8  | 2  | 2 |                                                                                                         | cytochrome b-c1 complex subunit Rieske<br>mitochondrial [Ovis aries]                                                |
| XP_00401312<br>7.3                  | 0.24 | 47 | 33 | 2 | Carbamidomethylation; Deamidation (NQ);<br>Oxidation (M); Phosphorylation (STY);<br>Dehydration; 2 more | actin cytoplasmic 2 [Ovis aries]                                                                                    |

|                      |      |    |     |   |                                                                                                         |                                                                            |
|----------------------|------|----|-----|---|---------------------------------------------------------------------------------------------------------|----------------------------------------------------------------------------|
| sp P60713 ACTB_SHEEP | 0.24 | 47 | 33  | 2 | Carbamidomethylation; Deamidation (NQ);<br>Oxidation (M); Phosphorylation (STY);<br>Dehydration; 2 more | Actin cytoplasmic 1 OS=Ovis aries<br>OX=9940 GN=ACTB PE=2 SV=1             |
| XP_02783496<br>8.1   | 0.23 | 7  | 2   | 2 |                                                                                                         | acetyl-CoA acetyltransferase mitochondrial<br>[Ovis aries]                 |
| W5PN85 W5PN85_SHEEP  | 0.23 | 7  | 2   | 2 |                                                                                                         | Acetyl-CoA acetyltransferase 1 OS=Ovis aries<br>OX=9940 GN=ACAT1 PE=3 SV=1 |
| XP_02783050<br>6.1   | 0.21 | 5  | 7   | 2 |                                                                                                         | collagen alpha-1(I) chain isoform X1 [Ovis aries]                          |
| W5P481 W5P481_SHEEP  | 0.21 | 5  | 7   | 2 |                                                                                                         | Collagen type I alpha 1 chain OS=Ovis aries<br>OX=9940 GN=COL1A1 PE=4 SV=1 |
| XP_00401268<br>5.1   | 0.18 | 4  | 2   | 2 | Deamidation (NQ)                                                                                        | very long-chain specific acyl-CoA dehydrogenase mitochondrial [Ovis aries] |
| XP_00400790<br>2.1   | 0.16 | 5  | 2   | 2 |                                                                                                         | dihydrolipoyl dehydrogenase mitochondrial<br>[Ovis aries]                  |
| sp P00922 CAH2_SHEEP | 0.13 | 7  | 2   | 2 |                                                                                                         | Carbonic anhydrase 2 OS=Ovis aries<br>OX=9940 GN=CA2 PE=1 SV=2             |
| XP_02782905<br>2.1   | 0.13 | 7  | 2   | 2 |                                                                                                         | carbonic anhydrase 2 [Ovis aries]                                          |
| W5PTU7 W5PTU7_SHEEP  | 0.13 | 6  | 2   | 2 |                                                                                                         | Carbonic anhydrase 2 OS=Ovis aries<br>OX=9940 GN=CA2 PE=3 SV=1             |
| W5PXG3 W5PXG3_SHEEP  | 0.11 | 20 | 2   | 2 |                                                                                                         | COX6C domain-containing protein OS=Ovis aries<br>OX=9940 PE=1 SV=1         |
| W5Q754 W5Q754_SHEEP  | 0.09 | 29 | 750 | 2 | Carbamidomethylation; Deamidation (NQ);<br>Oxidation (M); Phosphorylation (STY);<br>Dehydration; 3 more | Titin OS=Ovis aries OX=9940 GN=TTN<br>PE=4 SV=1                            |
| W5PTA0 W5PTA0_SHEEP  | 0.07 | 12 | 2   | 2 |                                                                                                         | Uncharacterized protein OS=Ovis aries<br>OX=9940 GN=ATP5PO PE=3 SV=1       |
| W5PT98 W5PT98_SHEEP  | 0.07 | 11 | 2   | 2 |                                                                                                         | Uncharacterized protein OS=Ovis aries<br>OX=9940 GN=ATP5PO PE=3 SV=1       |
| XP_02781523<br>0.1   | 0.06 | 34 | 14  | 2 | Deamidation (NQ); Oxidation (M); Pyro-glu from<br>Q                                                     | troponin T fast skeletal muscle isoform X25<br>[Ovis aries]                |
| XP_02781525<br>6.1   | 0.06 | 43 | 14  | 2 | Deamidation (NQ); Oxidation (M); Pyro-glu from<br>Q                                                     | troponin T fast skeletal muscle isoform X50<br>[Ovis aries]                |
| XP_02781525<br>4.1   | 0.06 | 43 | 14  | 2 | Deamidation (NQ); Oxidation (M); Pyro-glu from<br>Q                                                     | troponin T fast skeletal muscle isoform X48<br>[Ovis aries]                |
| XP_02781525<br>2.1   | 0.06 | 43 | 14  | 2 | Deamidation (NQ); Oxidation (M); Pyro-glu from<br>Q                                                     | troponin T fast skeletal muscle isoform X46<br>[Ovis aries]                |
| XP_02781524<br>8.1   | 0.06 | 42 | 14  | 2 | Deamidation (NQ); Oxidation (M); Pyro-glu from<br>Q                                                     | troponin T fast skeletal muscle isoform X43<br>[Ovis aries]                |
| XP_02781524<br>7.1   | 0.06 | 41 | 14  | 2 | Deamidation (NQ); Oxidation (M); Pyro-glu from<br>Q                                                     | troponin T fast skeletal muscle isoform X42<br>[Ovis aries]                |

|                    |      |    |    |   |                                                     |                                                             |
|--------------------|------|----|----|---|-----------------------------------------------------|-------------------------------------------------------------|
| XP_02781524<br>5.1 | 0.06 | 41 | 14 | 2 | Deamidation (NQ); Oxidation (M); Pyro-glu from<br>Q | troponin T fast skeletal muscle isoform X40<br>[Ovis aries] |
| XP_02781524<br>1.1 | 0.06 | 40 | 14 | 2 | Deamidation (NQ); Oxidation (M); Pyro-glu from<br>Q | troponin T fast skeletal muscle isoform X36<br>[Ovis aries] |
| XP_02781524<br>0.1 | 0.06 | 40 | 14 | 2 | Deamidation (NQ); Oxidation (M); Pyro-glu from<br>Q | troponin T fast skeletal muscle isoform X35<br>[Ovis aries] |
| XP_02781523<br>3.1 | 0.06 | 38 | 14 | 2 | Deamidation (NQ); Oxidation (M); Pyro-glu from<br>Q | troponin T fast skeletal muscle isoform X28<br>[Ovis aries] |
| XP_02781523<br>2.1 | 0.06 | 37 | 14 | 2 | Deamidation (NQ); Oxidation (M); Pyro-glu from<br>Q | troponin T fast skeletal muscle isoform X27<br>[Ovis aries] |
| XP_02781525<br>0.1 | 0.06 | 36 | 14 | 2 | Deamidation (NQ); Oxidation (M); Pyro-glu from<br>Q | troponin T fast skeletal muscle isoform X45<br>[Ovis aries] |
| XP_02781524<br>3.1 | 0.06 | 34 | 14 | 2 | Deamidation (NQ); Oxidation (M); Pyro-glu from<br>Q | troponin T fast skeletal muscle isoform X38<br>[Ovis aries] |
| XP_02781523<br>9.1 | 0.06 | 34 | 14 | 2 | Deamidation (NQ); Oxidation (M); Pyro-glu from<br>Q | troponin T fast skeletal muscle isoform X34<br>[Ovis aries] |
| XP_02781523<br>7.1 | 0.06 | 34 | 14 | 2 | Deamidation (NQ); Oxidation (M); Pyro-glu from<br>Q | troponin T fast skeletal muscle isoform X32<br>[Ovis aries] |
| XP_02781523<br>5.1 | 0.06 | 33 | 14 | 2 | Deamidation (NQ); Oxidation (M); Pyro-glu from<br>Q | troponin T fast skeletal muscle isoform X30<br>[Ovis aries] |



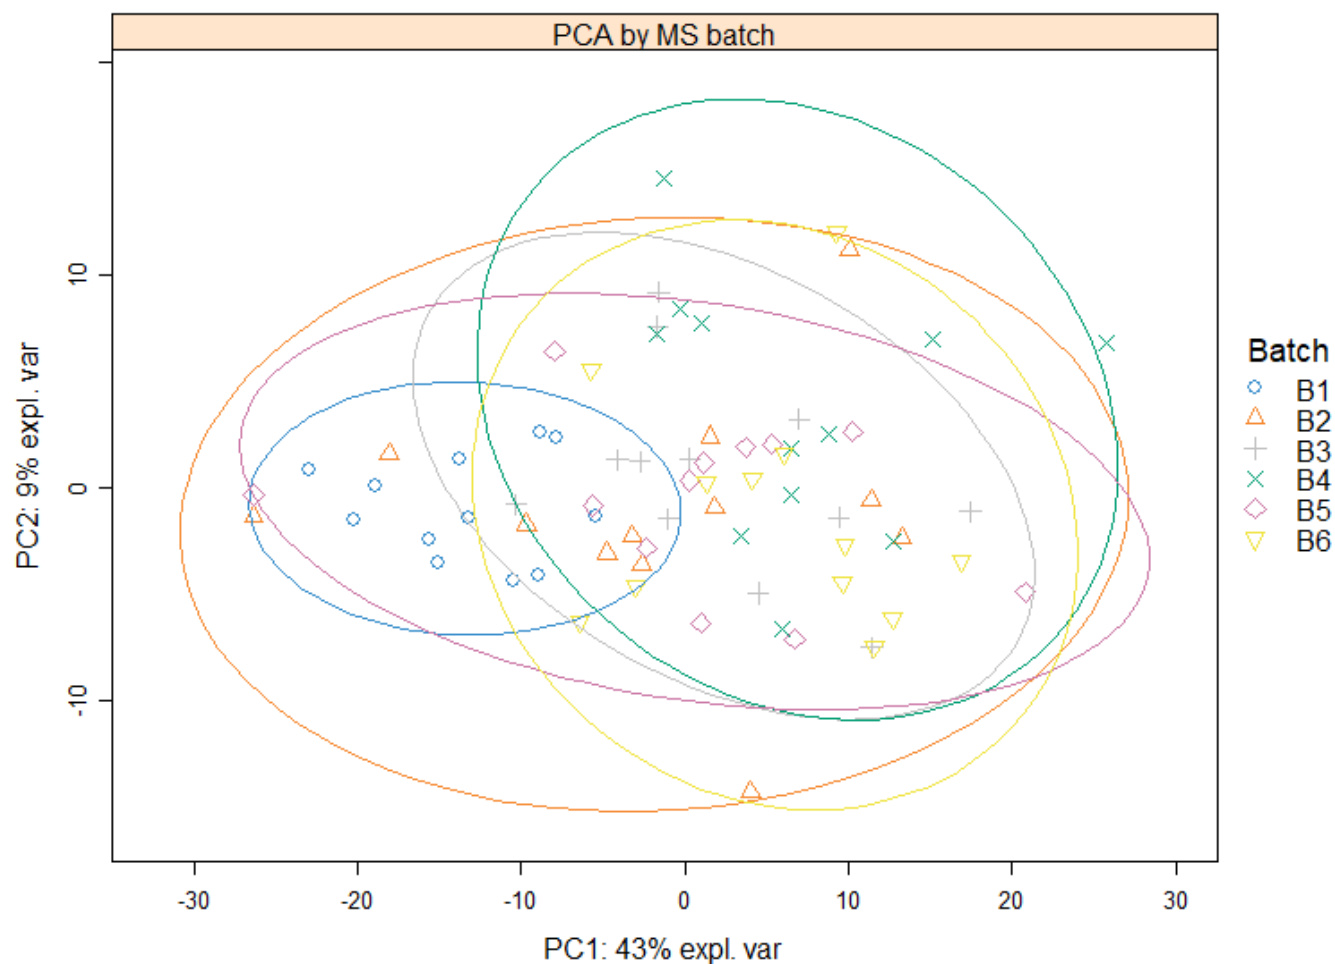

**Figure S1.** Principal component analysis for each of the six batches of samples from the LC-MSMS analysis. Samples from B1 were identified to have a significant batch effect ( $p < 0.05$ ) along the first, second, and third components after performing an analysis of variance on these components.

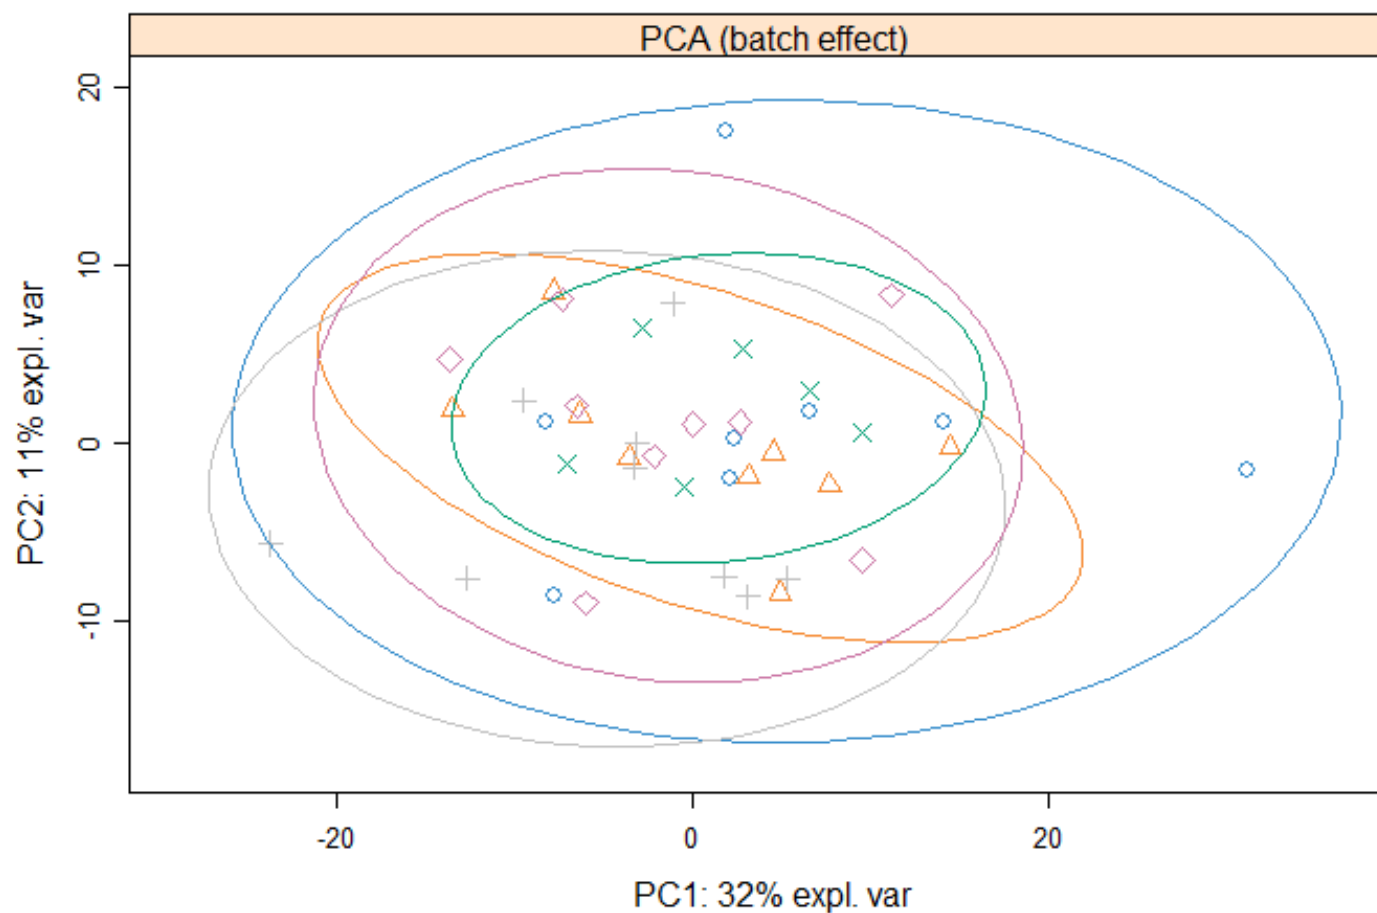

**Figure S2.** Principal component analysis for the five batches (B2, B3, B4, B5, and B6) of samples from the LC-MSMS analysis after removal of samples from the first batch (B1).
